EXPRESSION OF CONCERN

## Expression of Concern: InDel markers: An extended marker resource for molecular breeding in chickpea

The *PLOS One* Editors

The *PLOS One* Editors issue this Expression of Concern because this article [1] is one of a series of articles for which there are concerns about competing interests and the reliability of peer review. The competing interests were not disclosed as required by PLOS policy.

PLOS regrets that the peer review concerns were not identified and addressed before the article was published.

The Editors have no evidence of any author involvement in the peer review concerns for this article.

In following up on this matter, PLOS did not evaluate the article's integrity or scientific validity.

### Reference

1. Jain A, Roorkiwal M, Kale S, Garg V, Yadala R, Varshney RK. InDel markers: An extended marker resource for molecular breeding in chickpea. *PLoS One*. 2019;14(3):e0213999. <https://doi.org/10.1371/journal.pone.0213999> PMID: [30883592](https://pubmed.ncbi.nlm.nih.gov/30883592/)

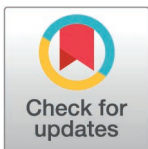

### OPEN ACCESS

**Citation:** The *PLOS One* Editors (2026) Expression of Concern: InDel markers: An extended marker resource for molecular breeding in chickpea. *PLoS One* 21(6): e0350436. <https://doi.org/10.1371/journal.pone.0350436>

**Published:** June 1, 2026

**Copyright:** © 2026 The *PLOS One* Editors. This is an open access article distributed under the terms of the [Creative Commons Attribution License](https://creativecommons.org/licenses/by/4.0/), which permits unrestricted use, distribution, and reproduction in any medium, provided the original author and source are credited.
